# Supplementary material
Source: publisher figshare collection journal article supplement (https://asha.figshare.com/articles/dataset/_/6170330)
Supplement: Supplementary file 1 [file 1]

**Supplemental Table 1.** Additional assessment measures for participants with aphasia (PWA) with high aphasia quotient (AQ) as judged by the Western Aphasia Battery (WAB; Kertesz, 1982).

| Participant | Sex | Age (years) | AQ   | WAB fluency score <sup>a</sup> | BNT         | Attn | Mem         | Exec        | VS          | PALPA word semantic association | Sentence comprehension | Verbal fluency |
|-------------|-----|-------------|------|--------------------------------|-------------|------|-------------|-------------|-------------|---------------------------------|------------------------|----------------|
| PWA13       | M   | 66          | 97.2 | 10                             | <u>65</u>   | WNL  | <u>Mild</u> | WNL         | WNL         | <u>73%</u>                      |                        | <u>50%</u>     |
| PWA22       | F   | 87          | 97.4 | 10                             | <u>85</u>   | WNL  | WNL         | WNL         | WNL         | <u>80%</u>                      | <u>81%</u>             |                |
| PWA25       | M   | 57          | 97.2 | 10                             | <u>83.3</u> | WNL  | <u>Mild</u> | WNL         | <u>Mild</u> |                                 |                        |                |
| PWA38       | M   | 44          | 95.5 | <u>9</u>                       | 95          | WNL  | <u>Mild</u> | WNL         | WNL         | <u>77%</u>                      | <u>79%</u>             | <u>37%</u>     |
| PWA40       | M   | 65          | 98   | <u>9</u>                       | 97          | WNL  | WNL         | <u>Mild</u> | <u>Mild</u> | <u>87%</u>                      |                        | <u>20%</u>     |
| PWA44       | M   | 69          | 100  | 10                             | 96.66       | WNL  | <u>Mild</u> | WNL         | WNL         |                                 | <u>86%</u>             |                |
| PWA45       | F   | 77          | 98   | <u>9</u>                       | 98.3        | WNL  | WNL         | WNL         | WNL         |                                 | <u>84%</u>             |                |
| PWA50       | F   | 60          | 98.9 | 10                             | 98.33       | WNL  | WNL         | WNL         | WNL         | <u>80%</u>                      |                        | <u>30%</u>     |
| PWA53       | F   | 50          | 93.9 | <u>9</u>                       | 100         | WNL  | WNL         | WNL         | WNL         |                                 | <u>86%</u>             |                |

*Note.* BNT = Boston Naming Test; Attn = attention composite score; Mem = memory composite score; Exec = executive functions composite score; VS = visuospatial skills composite score; PALPA = Psycholinguistic Assessments of Language Processing in Aphasia (Kay, Lesser, & Coltheart, 1992); M = male; F = female.

<sup>a</sup>A score of 9 on the WAB fluency describes “mostly complete, relevant sentences; occasional hesitation and/or paraphasias. Some word finding difficulty. May have some articulatory errors.”

## Reference

Kay, J., Lesser, R., & Coltheart, M. (1992). *Psycholinguistic Assessments of Language Processing in Aphasia (PALPA): An introduction*. Hove, United Kingdom: Erlbaum.

Kertesz, A. (1982). *The Western Aphasia Battery*. Philadelphia, PA: Gruyne & Stratton.
