# Supplementary material
Source: publisher figshare collection journal article supplement (https://asha.figshare.com/articles/dataset/_/6170330)
Supplement: Supplementary file 2 [file 1]

**Supplemental Table 2.** Learning and best fit model scores for all participants with aphasia (PWA) and control (Cn) participants.

| <b>Participant</b> | <b>Slope Score</b> | <b>Model Score Training</b> | <b>Training Strategy</b> | <b>Model Score Testing</b> | <b>Testing Strategy</b> |
|--------------------|--------------------|-----------------------------|--------------------------|----------------------------|-------------------------|
| PWA1               | -0.52              | 0.03                        | RP                       | 0.01                       | RP                      |
| PWA2               | -6.494             | 0.02                        | RP                       | 0.03                       | RP                      |
| PWA3               | 2.55               | 0.02                        | RP                       | 0.03                       | RP                      |
| PWA4               | -1.90              | 0.02                        | RP                       | 0.01                       | RP                      |
| PWA5               | 0.445              | 0.01                        | RP                       | 0.01                       | RP                      |
| PWA6               | -0.78              | 0.01                        | RP                       | 0.01                       | RP                      |
| PWA7               | -0.562             | 0.04                        | RP                       | 0.01                       | RP                      |
| PWA8               | -1.17              | 0.02                        | RP                       | 0.02                       | RP                      |
| PWA9               | -0.52              | 0.02                        | RP                       | 0.01                       | RP                      |
| PWA10              | 1.98               | 0.04                        | RP                       | 0.02                       | RP                      |
| PWA11              | 1.472              | 0.01                        | RP                       | 0.01                       | RP                      |
| PWA12              | -1.126             | 0.07                        | RP                       | 0.10                       | RP                      |
| PWA13              | -2.857             | 0.01                        | RP                       | 0.01                       | RP                      |
| PWA14              | 0.346              | 0.01                        | RP                       | 0.03                       | RP                      |
| PWA15              | 2.511              | 0.01                        | RP                       | 0.01                       | RP                      |
| PWA16              | 1.43               | 0.04                        | RP                       | 0.02                       | RP                      |
| PWA17              | -0.22              | 0.01                        | RP                       | 0.01                       | RP                      |
| PWA18              | -0.65              | 0.01                        | RP                       | 0.04                       | RP                      |
| PWA19              | -0.52              | 0.02                        | RP                       | 0.00                       | RP                      |
| PWA20              | -0.78              | 0.05                        | RP                       | 0.37                       | RP                      |
| PWA21              | -4.24              | 0.04                        | RP                       | 0.02                       | RP                      |
| PWA22              | -0.77              | 0.14                        | RP                       | 0.02                       | RP                      |
| PWA23              | -1.17              | 0.03                        | SF – 4                   | 0.02                       | RP                      |
| PWA24              | 6.429              | 0.02                        | RP                       | 0.03                       | SF – 9                  |
| PWA25              | 8.57               | 0.02                        | RP                       | 0.04                       | SF – 9                  |
| PWA26              | -3.33              | 0.04                        | RP                       | 0.04                       | SF – 8                  |
| PWA27              | -9.74              | 0.01                        | RP                       | 0.05                       | SF – 6                  |
| PWA28              | -7.489             | 0.04                        | RP                       | 0.09                       | SF – 3                  |
| PWA29              | 7.79               | 0.01                        | RP                       | 0.02                       | SF – 2                  |
| PWA30              | 10                 | 0.03                        | RP                       | 0.03                       | SF – 10                 |
| PWA31              | -0.52              | 0.03                        | RP                       | 0.05                       | SF – 10                 |
| PWA32              | 9.87               | 0.02                        | RP                       | 0.04                       | SF – 10                 |
| PWA33              | 5.84               | 0.01                        | RP                       | 0.03                       | SF – 3                  |
| PWA34              | 7.79               | 0.02                        | RP                       | 0.03                       | SF – 10                 |
| PWA35              | 7.45               | 0.02                        | RP                       | 0.05                       | SF – 1                  |
| PWA36              | 8.18               | 0.04                        | SF – 1                   | 0.03                       | SF – 1                  |
| PWA37              | 2.27               | 0.02                        | SF – 8                   | 0.02                       | SF – 8                  |

|       |       |      |         |      |         |
|-------|-------|------|---------|------|---------|
| PWA38 | 5.76  | 0.02 | SF – 6  | 0.02 | SF – 6  |
| PWA39 | 8.7   | 0.04 | SF – 6  | 0.03 | SF – 6  |
| PWA40 | 6.36  | 0.02 | SF – 6  | 0.02 | SF – 6  |
| PWA41 | 10.26 | 0.02 | SF – 3  | 0.04 | SF – 3  |
| PWA42 | 8.48  | 0.05 | SF – 2  | 0.03 | SF – 2  |
| PWA43 | 9.48  | 0.02 | SF – 2  | 0.03 | SF – 2  |
| PWA44 | 9.22  | 0.03 | SF – 1  | 0.04 | SF – 1  |
| PWA45 | 3.94  | 0.03 | OMC     | 0.03 | SF – 6  |
| PWA46 | 6.02  | 0.03 | OMC     | 0.06 | SF – 8  |
| PWA47 | 7.66  | 0.03 | OMC     | 0.04 | SF – 5  |
| PWA48 | 9.31  | 0.04 | RP      | 0.04 | OMC     |
| PWA49 | 6.71  | 0.04 | RP      | 0.03 | OMC     |
| PWA50 | 8.766 | 0.04 | SF – 9  | 0.04 | OMC     |
| PWA51 | 10.26 | 0.04 | SF – 10 | 0.03 | OMC     |
| PWA52 | 8.44  | 0.07 | SF – 9  | 0.06 | OMC     |
| PWA53 | 9.48  | 0.04 | OMC     | 0.03 | OMC     |
| <hr/> |       |      |         |      |         |
| Cn1   | 4.63  | 0.04 | SF – 4  | 0.03 | RP      |
| Cn2   | 9.74  | 0.02 | OMC     | 0.04 | OMC     |
| Cn3   | 11.56 | 0.03 | OMC     | 0.01 | OMC     |
| Cn4   | 10.52 | 0.05 | RP      | 0.03 | OMC     |
| Cn5   | 7.71  | 0.04 | OMC     | 0.06 | OMC     |
| Cn6   | 3.07  | 0.02 | RP      | 0.01 | SF – 9  |
| Cn7   | 8.70  | 0.01 | SF – 10 | 0.04 | SF – 6  |
| Cn8   | 6.62  | 0.03 | OMC     | 0.04 | SF – 5  |
| Cn9   | 7.96  | 0.03 | RP      | 0.04 | SF – 4  |
| Cn10  | –3.64 | 0.01 | RP      | 0.03 | SF – 1  |
| Cn11  | 8.96  | 0.03 | RP      | 0.04 | SF – 10 |
| Cn12  | 5.89  | 0.09 | RP      | 0.02 | SF – 10 |

*Note.* RP = random pattern; SF = single feature strategy, which is presented here with the number of the feature dimension to which the participant attended; OMC = optimal multi-cue.
